# Supplementary material for: Resveratrol loaded polymeric micelles for theranostic targeting of breast cancer cells
Source: PubMed Central journal article supplement (PMC7738945; doi:10.7150/ntno.51955), 2021-01-01
Supplement: ntnov05p0113s1.pdf [file ntnov05p0113s1.pdf]

## Supplementary Information

### Resveratrol loaded polymeric micelles for theranostic targeting of breast cancer cells

Authors: Yiota Gregoriou<sup>1,2,3\*</sup>, Gregoria Gregoriou<sup>1</sup>, Vural Yilmaz<sup>1</sup>, Konstantinos Kapnisis<sup>4</sup>, Marianna Prokopi<sup>4</sup>, Andreas Anayiotos<sup>4</sup>, Katerina Strati<sup>1</sup>, Nikolas Dietis<sup>5</sup>, Andreas I. Constantinou<sup>1</sup> and Chrysafis Andreou<sup>2,3\*</sup>

<sup>1</sup> Department of Biological Sciences, Faculty of Pure and Applied Sciences, University of Cyprus, Nicosia, Cyprus

<sup>2</sup> *Department of Electrical and Computer Engineering* University of Cyprus, Nicosia, Cyprus

<sup>3</sup> Emphasis Research Centre, University of Cyprus, Nicosia, Cyprus

<sup>4</sup> Department of Mechanical Engineering and Material Science and Engineering, Cyprus University of Technology, Limassol, Cyprus

<sup>5</sup> Medical School University of Cyprus, Nicosia, Cyprus

\* Corresponding Author: Yiota Gregoriou, Laboratory of Cancer Biology and Chemoprevention, Department of Biological Sciences, Faculty of Pure and Applied Sciences, University of Cyprus, P.O. Box 20537, 1678 Nicosia, Cyprus. E-mail: [gregoriou.panayiota@ucy.ac.cy](mailto:gregoriou.panayiota@ucy.ac.cy)

\* Corresponding Author: Chrysafis Andreou, Department of Electrical and Computer Engineering, University of Cyprus, P.O. Box 20537, 1678 Nicosia, Cyprus. E-mail: [andreou.chrysafis@ucy.ac.cy](mailto:andreou.chrysafis@ucy.ac.cy)

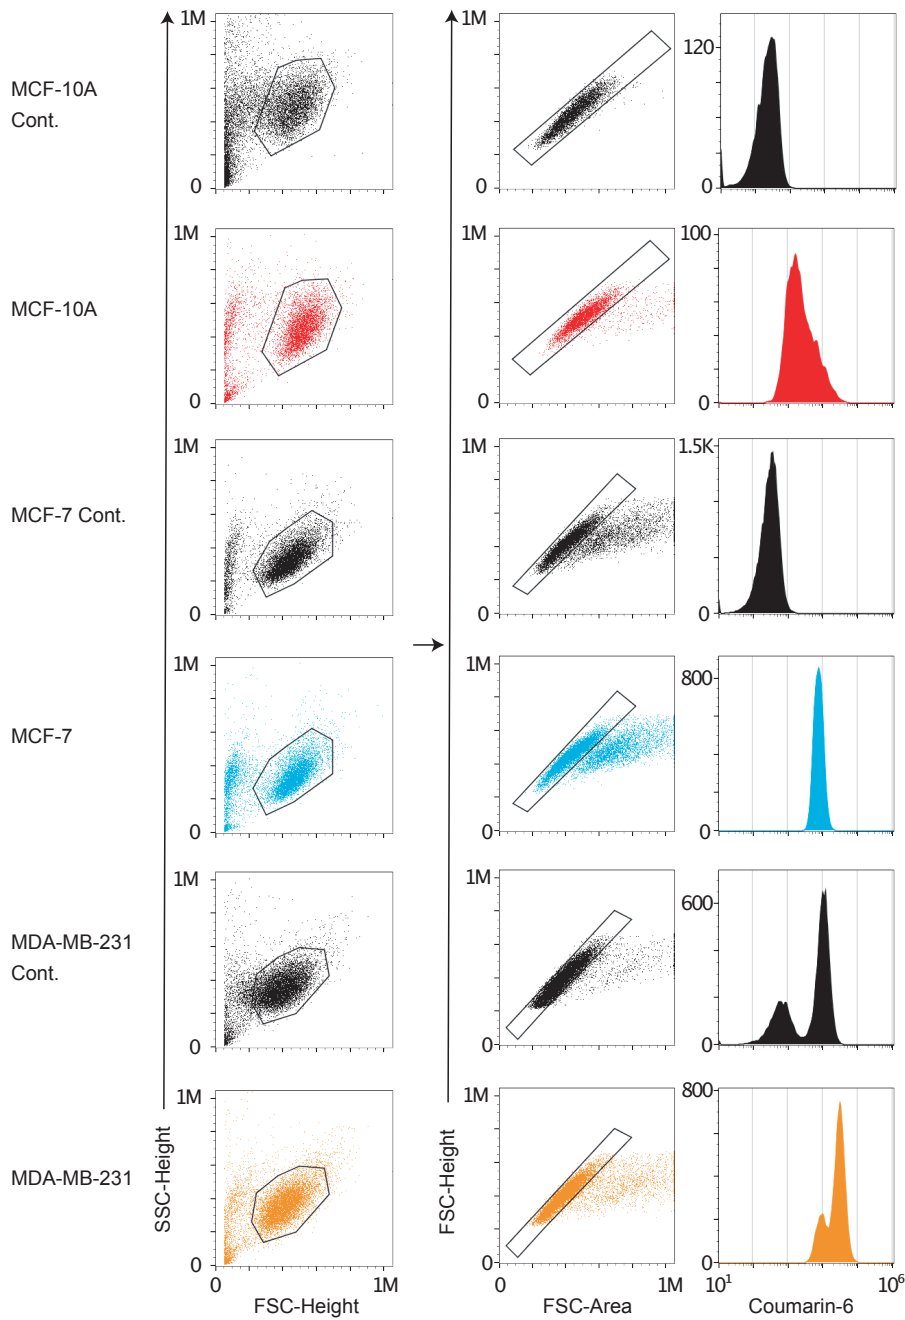

**Figure S1. Representative FACS dot plots of gating strategy.** Mean fluorescence intensity (MFI) of Coumarin 6 for all cell lines tested in the one-hour treatment group. The population of cells was detected depending on their size and complexity (FSC-SSC gate) and later the doublets were excluded (FSC-Height/FSC-Area gate). The Flow cytometric data from single cells is displayed as histograms.

| P-value    |         |         |         |
|------------|---------|---------|---------|
| MDA-MB-231 |         |         |         |
|            | 24 h    | 48 h    | 72 h    |
| 0.25 µg/ml | ns      | ns      | 0.0113  |
| 0.50 µg/ml | ns      | ns      | 0.0003  |
| 1.2 µg/ml  | ns      | 0.0001  | <0.0001 |
| 2.5 µg/ml  | <0.0001 | <0.0001 | <0.0001 |

| P-value    |      |      |        |
|------------|------|------|--------|
| MCF-10A    |      |      |        |
|            | 24 h | 48 h | 72 h   |
| 0.25 µg/ml | ns   | ns   | ns     |
| 0.50 µg/ml | ns   | ns   | ns     |
| 1.2 µg/ml  | ns   | ns   | 0.0283 |
| 2.5 µg/ml  | ns   | ns   | ns     |

| P-value    |         |         |         |
|------------|---------|---------|---------|
| MCF-7      |         |         |         |
|            | 24 h    | 48 h    | 72 h    |
| 0.25 µg/ml | ns      | 0.0098  | 0.006   |
| 0.50 µg/ml | 0.0016  | 0.0036  | 0.0002  |
| 1.2 µg/ml  | 0.0006  | <0.0001 | <0.0001 |
| 2.5 µg/ml  | <0.0001 | <0.0001 | <0.0001 |

Table S1: P values of MCF-10A, MCF-7 and MDA-MB-231 cell lines. The values were calculated by the one-way ANOVA test and at the 0.05 level were considered statistically significant.
